# Supplementary material
Source: PubMed Central journal article supplement (PMC2998165)
Supplement: supp_dev.052985_DEV052985TableS1.pdf [file supp_dev.052985_DEV052985TableS1.pdf]

**Table S1. Depletion of *rock2b* disrupts heart and gut laterality**

| Embryos                                                 | Heart    |        |          |            | Gut      |        |          |           |
|---------------------------------------------------------|----------|--------|----------|------------|----------|--------|----------|-----------|
|                                                         | <i>n</i> | Normal | Reversed | No looping | <i>n</i> | Normal | Reversed | Bilateral |
| Wild type                                               | 650      | 97%    | 1%       | 2%         | 390      | 98%    | 1%       | 1%        |
| 4.4 ng Control MO                                       | 74       | 98%    | 1%       | 1%         | 64       | 94%    | 3%       | 3%        |
| 0.8 ng <i>rock2b</i> MO-1                               | 149      | 36%    | 15%      | 48%        | 149      | 46%    | 38%      | 16%       |
| 0.4 ng <i>rock2b</i> MO-1                               | 214      | 57%    | 17%      | 26%        | 52       | 54%    | 35%      | 12%       |
| 0.4 ng <i>rock2b</i> MO-1 +<br>50 pg <i>GFP</i> RNA     | 128      | 48%    | 26%      | 26%        | 128      | 52%    | 32%      | 16%       |
| 0.4 ng <i>rock2b</i> MO-1 +<br>10 pg <i>rock2b</i> RNA  | 151      | 72%    | 21%      | 7%         | 151      | 60%    | 20%      | 20%       |
| 0.4 ng <i>rock2b</i> MO-1 +<br>25 pg <i>rock2b</i> RNA  | 117      | 79%    | 12%      | 9%         | 117      | 71%    | 14%      | 15%       |
| 0.4 ng <i>rock2b</i> MO-1 +<br>25 pg <i>CA-Rock</i> RNA | 110      | 83%    | 12%      | 5%         | 82       | 80%    | 12%      | 7%        |
| 4.4 ng <i>rock2b</i> MO-2                               | 151      | 68%    | 11%      | 21%        | 71       | 77%    | 11%      | 11%       |
| 4.4 ng <i>rock2b</i> MO-2 +<br>25 pg <i>CA-Rock</i> RNA | 115      | 88%    | 6%       | 6%         | 117      | 88%    | 5%       | 7%        |
